## Correction

**Correction: P-cadherin mutations are associated with high basal Wnt activity and stemness in canine mammary tumor cell lines****Elpetra Timmermans-Sprang<sup>1</sup>, Rob W.J. Collin<sup>2,3</sup>, Arjen Henkes<sup>2</sup>, Meike Philipssen<sup>1</sup> and Jan A. Mol<sup>1</sup>**<sup>1</sup>Department of Clinical Sciences of Companion Animals, Faculty of Veterinary Medicine, Utrecht University, Utrecht, The Netherlands<sup>2</sup>Department of Human Genetics, Radboud University Medical Center, Nijmegen, The Netherlands<sup>3</sup>Donders Institute for Brain, Cognition and Behaviour, Radboud University Medical Center, Nijmegen, The Netherlands**Published:** February 04, 2020**Copyright:** Timmermans-Sprang et al. This is an open-access article distributed under the terms of the Creative Commons Attribution License 3.0 (CC BY 3.0), which permits unrestricted use, distribution, and reproduction in any medium, provided the original author and source are credited.**This article has been corrected:** The name of the 2nd author has been updated as follows:**Rob W.J. Collin**Original article: Oncotarget. 2019; 10:2930–2946. <https://doi.org/10.18632/oncotarget.26873>
